# Supplementary material for: Mapping Geographical Differences and Examining the Determinants of Childhood Stunting in Ethiopia: A Bayesian Geostatistical Analysis
Source: MDPI journal article supplement (doi:10.3390/nu13062104), 2021-06-19
Supplement: s1 [file s1]

Supplementary Materials

# Mapping Geographical Differences and Examining the Determinants of Childhood Stunting in Ethiopia: A Bayesian Geostatistical Analysis

Kedir Y. Ahmed <sup>1,2,\*</sup>, Kingsley E. Agho <sup>1,3,4</sup>, Andrew Page <sup>1</sup>, Amit Arora <sup>1,3,5,6,7</sup>, Felix Akpojene Ogbo <sup>1,8</sup> and on behalf the Global Maternal and Child Health Research Collaboration (GloMACH) <sup>†</sup>

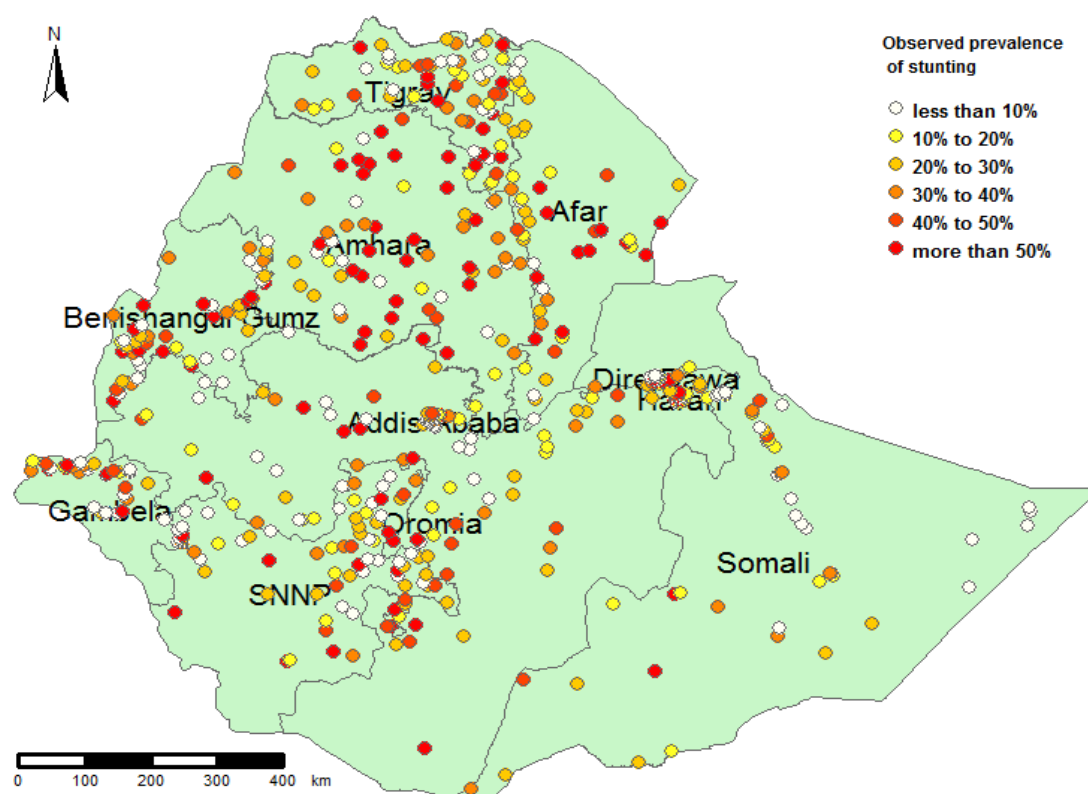

**Figure S1.** Cluster-level observed prevalence of stunting among children 0–23 months of age in Ethiopia, 2016 EDHS.

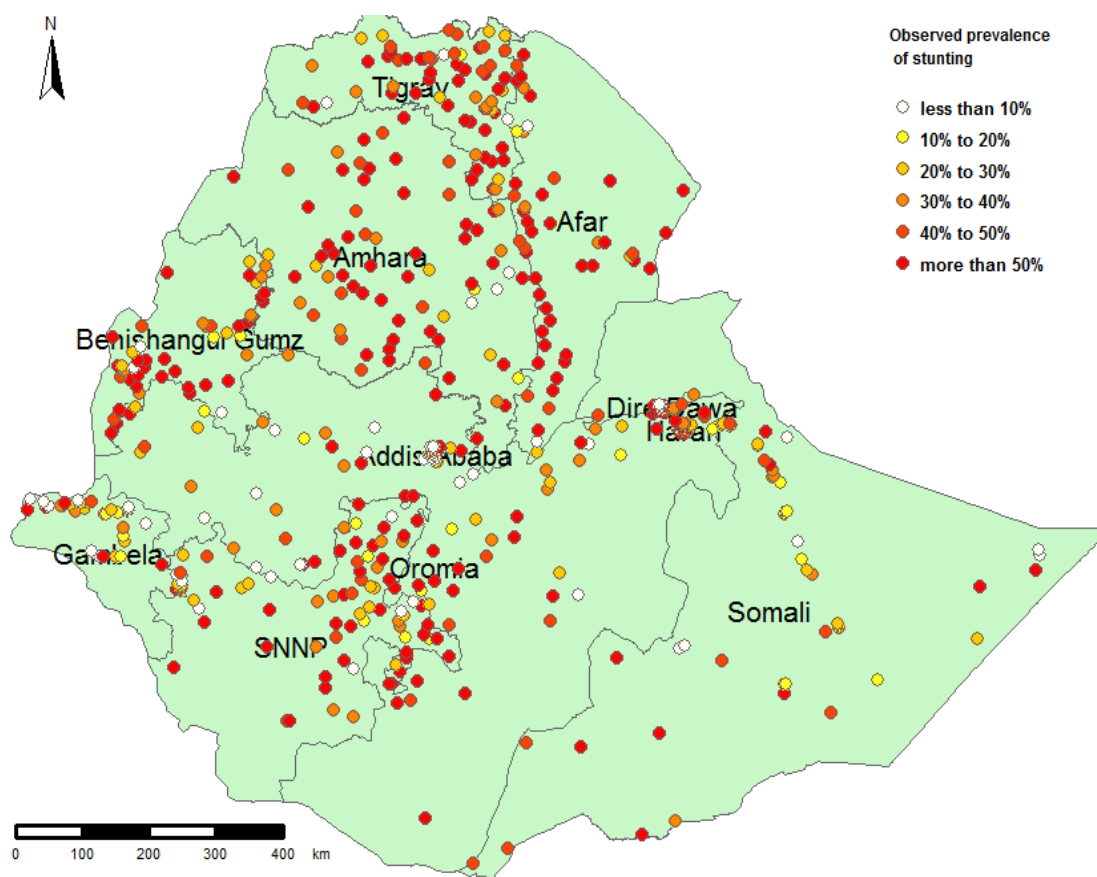

**Figure S2.** Cluster-level observed prevalence of childhood stunting among children aged 24–59 months in Ethiopia, 2016 EDHS.

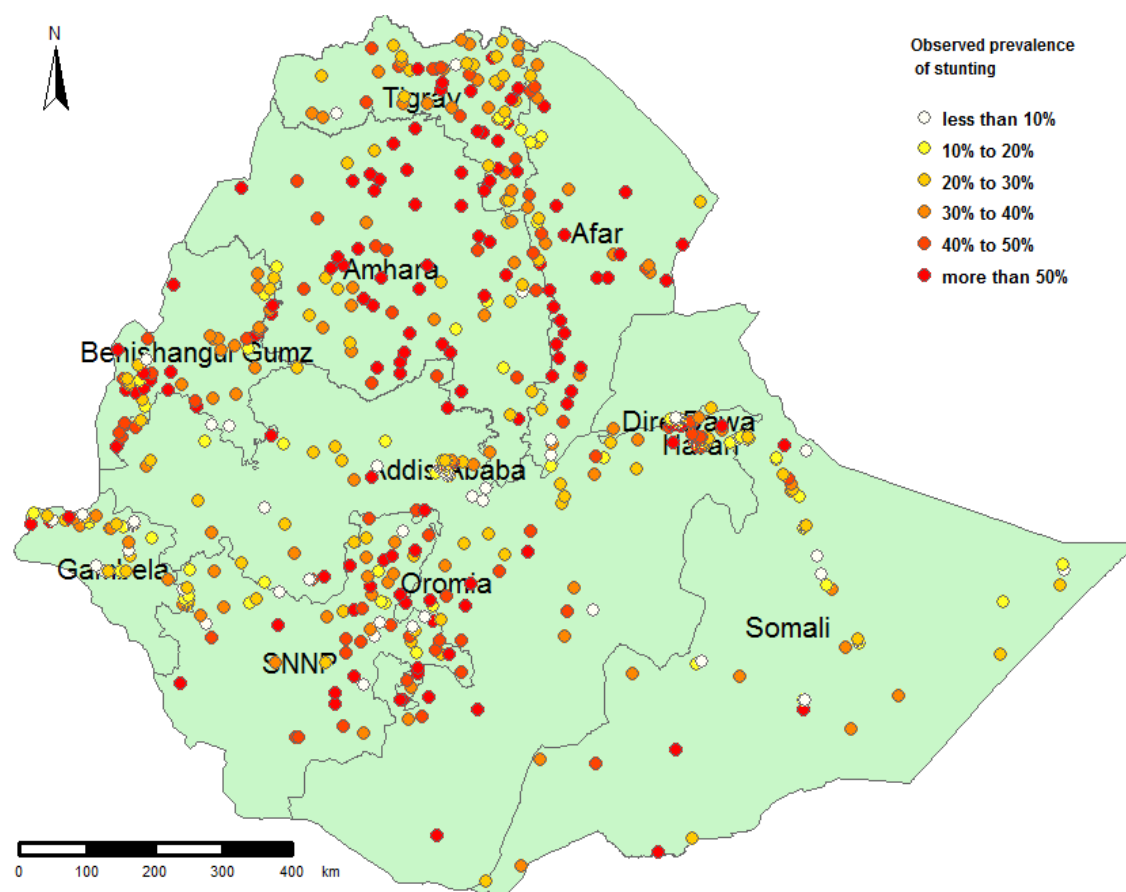

**Figure S3.** Cluster-level observed prevalence of childhood stunting among children aged 0–59 months in Ethiopia, 2016 EDHS.

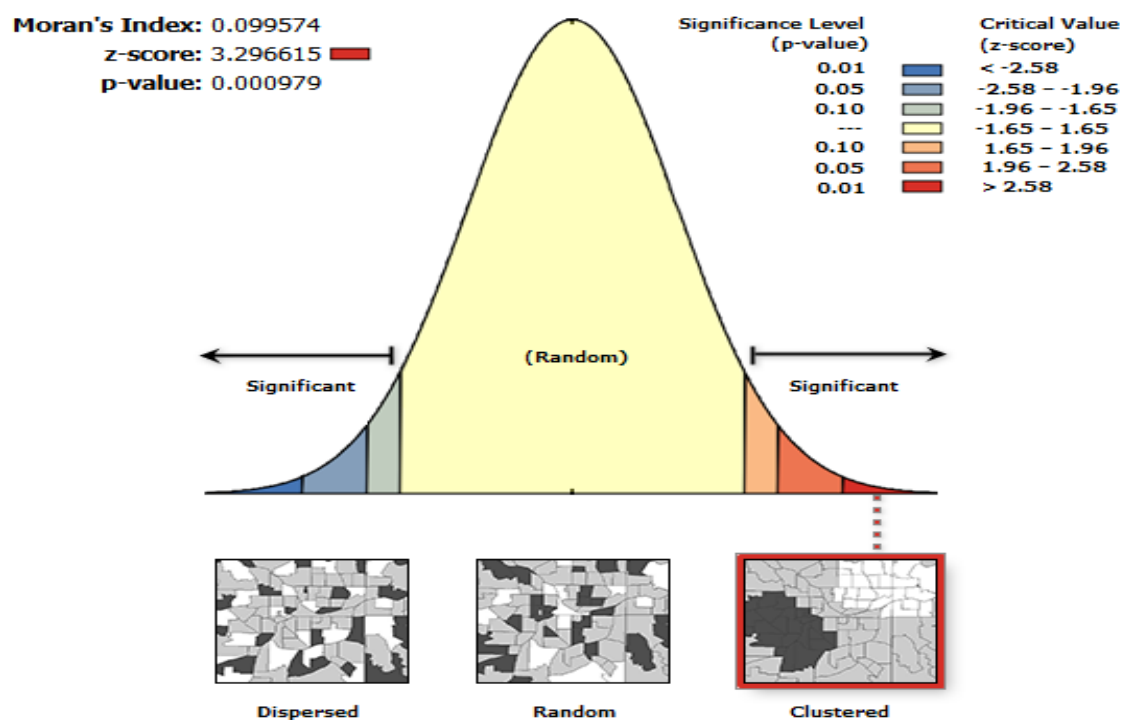

Given the z-score of 3.29661540159, there is a less than 1% likelihood that this clustered pattern could be the result of random chance.

**Figure S4.** Global spatial autocorrelation analyses for stunting among children aged children 0–59 months.

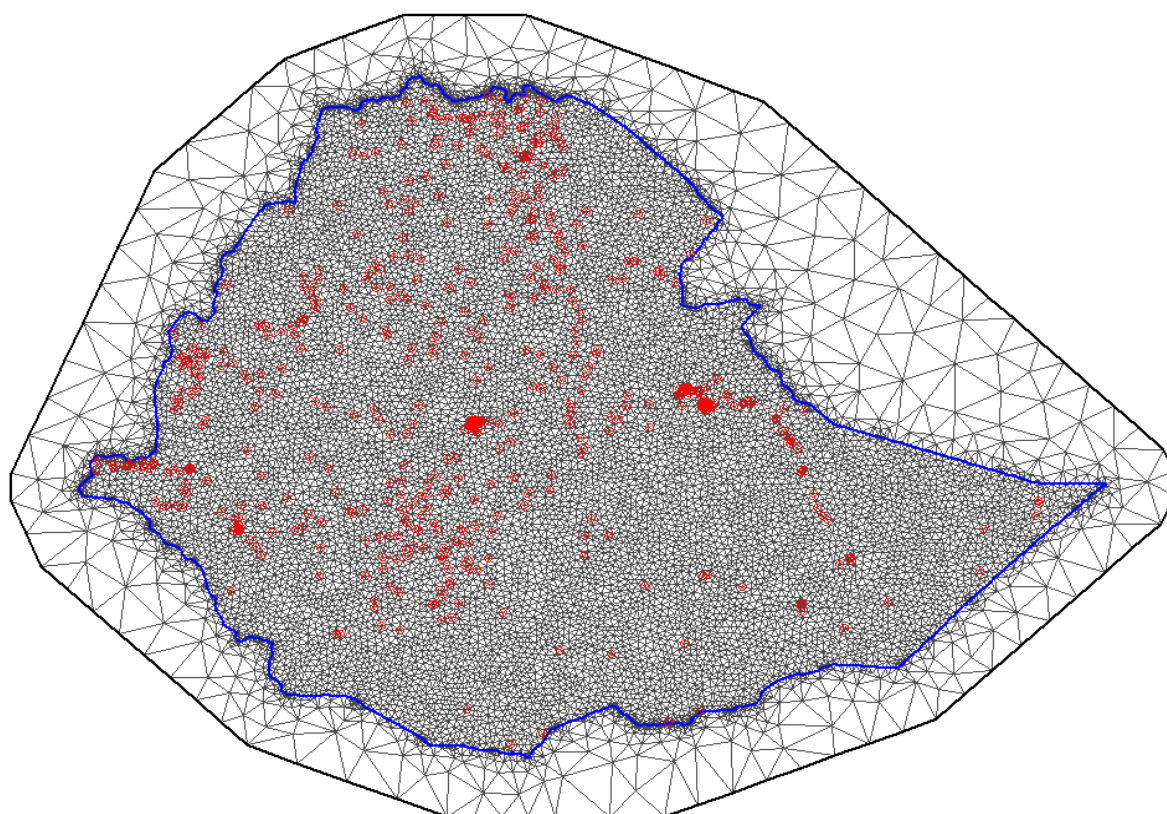

**Figure S5.** An artificially created mesh to represent the neighbouring structure of the study region in Ethiopia.

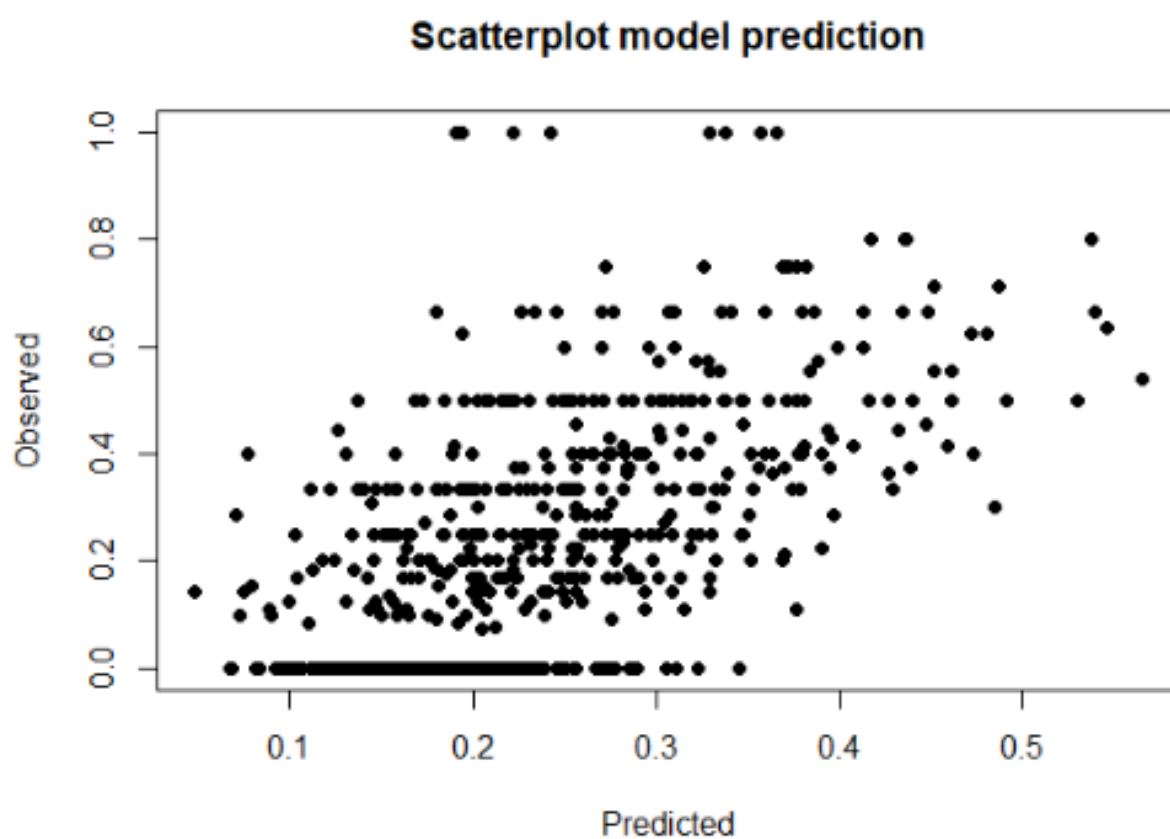

**Figure S6.** Correlation between observed and predicted values for model validation.

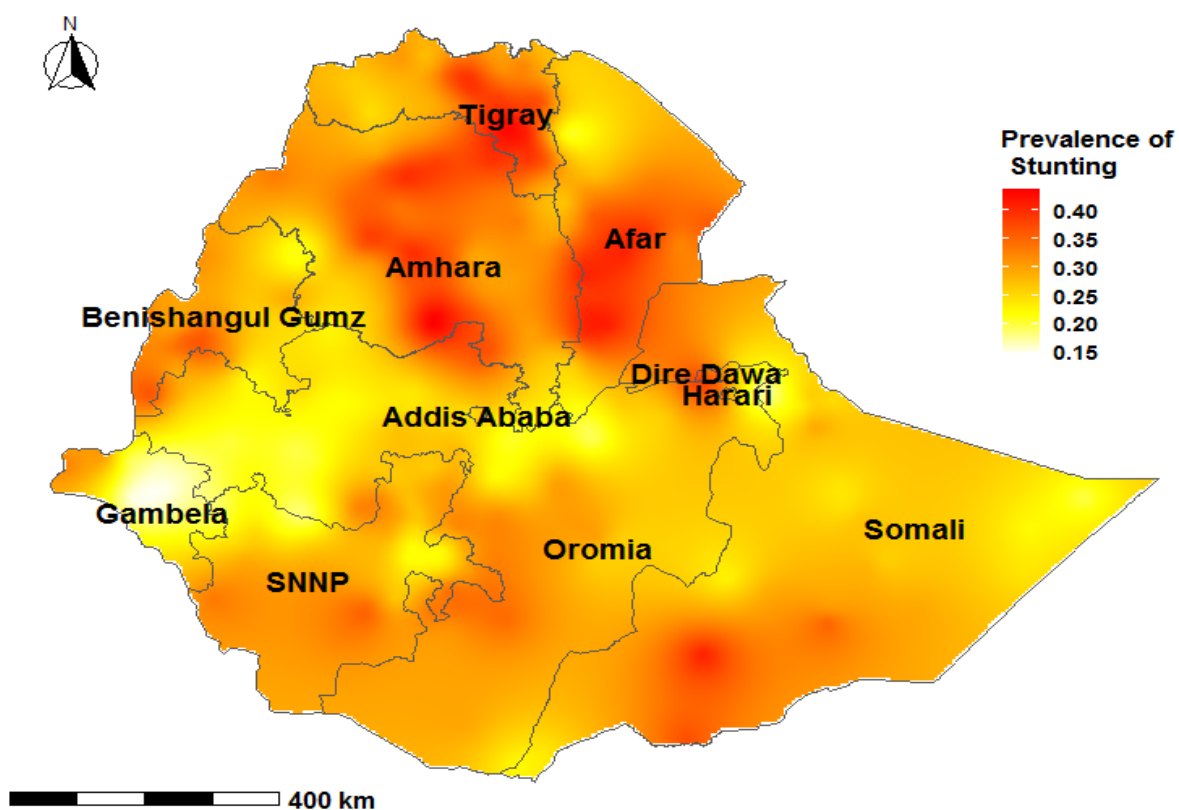

Figure S7. Predicted prevalence of stunting among children 0–59 months of age in Ethiopia, 2016 EDHS.

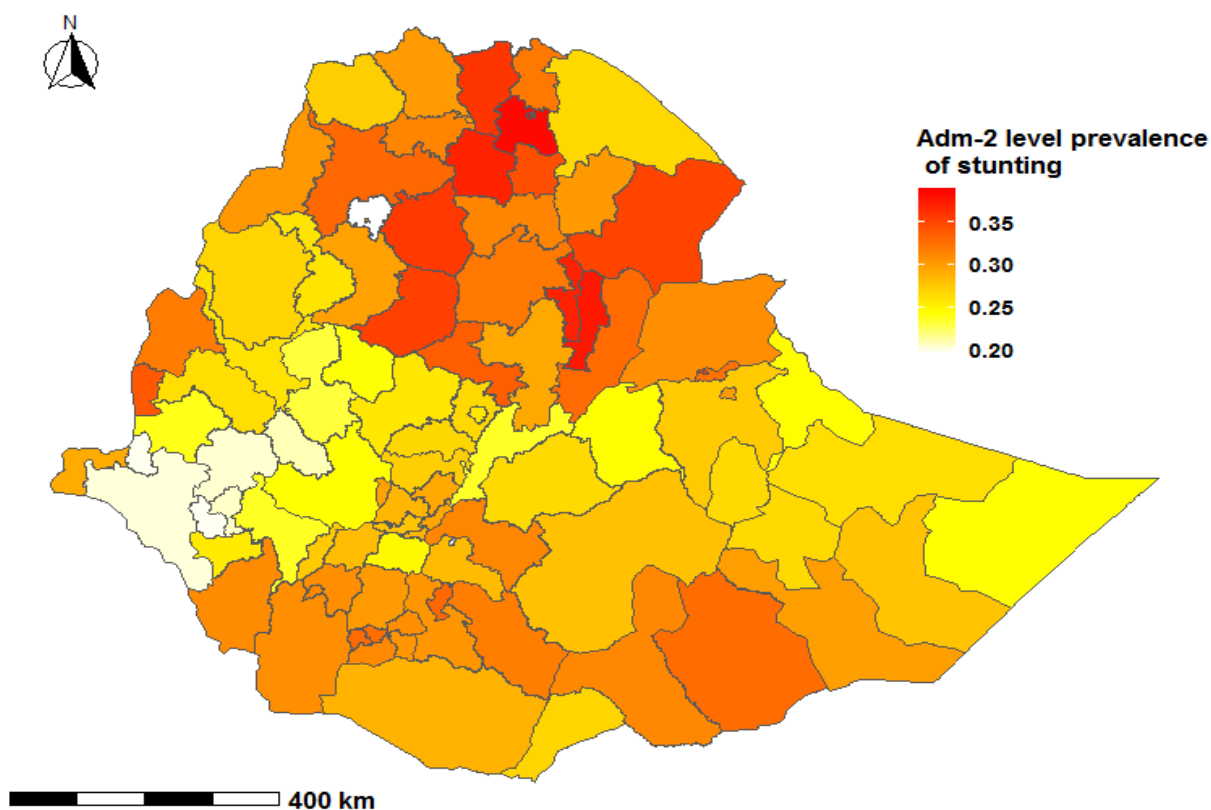

Figure S8. Second administrative level prevalence of stunting among children 0–59 months of age in Ethiopia, EDHS 2016.

**Table S1.** Definition of proximal and contextual factors associated with childhood stunting among children under-five years (identified from a review of conceptual framework and prior studies).

| Independent variable                                              | Definitions                                                                                                                                                                                                                                                      | Reference category                                   | Data sources                   |
|-------------------------------------------------------------------|------------------------------------------------------------------------------------------------------------------------------------------------------------------------------------------------------------------------------------------------------------------|------------------------------------------------------|--------------------------------|
| <i>Proximal factors</i>                                           |                                                                                                                                                                                                                                                                  |                                                      |                                |
| Early initiation of breast-feeding (EIBF) [1]                     | EIBF was grouped as '1' = 'initiated breastfeeding within 1 h of birth', or '2' = 'Not initiated breast-feeding within 1 h of birth'                                                                                                                             | Not initiated breastfeed-<br>ing within 1 h of birth | Self-reports                   |
| Minimum dietary diver-<br>sity (MDD) [1]                          | MDD was grouped as '1' = 'met MDD' or '2' = 'did not meet MDD'                                                                                                                                                                                                   | Did not meet MDD                                     | Self-reports                   |
| Minimum meal fre-<br>quency (MMF) [1]                             | MMF was grouped as '1' = 'met MMF' or '2' = 'did not meet MMF'                                                                                                                                                                                                   | Did not meet MMF                                     | Self-reports                   |
| Type of foods in the past<br>24 hrs [2]                           | The type of food consumed within the past 24 hours was grouped as '1' = 'only breastmilk', '2' = 'breastmilk and supplementary foods' or '3' = 'no breastmilk'                                                                                                   | No breastmilk                                        | Self-reports                   |
| Duration of breastfeed-<br>ing [2]                                | Grouped as '1' = 'less than 12 months' or '2' = '12 months or more'                                                                                                                                                                                              | 12 months or more                                    | Self-reports                   |
| Bottle feeding [1]                                                | Grouped as '1' = 'bottle feeding' or '2' = 'no bottle feeding'                                                                                                                                                                                                   | No bottle feeding                                    | Self-reports                   |
| Diarrhoea [3,4]                                                   | Diarrhoea was defined as a passing of abnormal stools during the two weeks preceding the survey. Diarrhoea was grouped as '1' = 'experienced diarrhoea' or '2' = 'did not experience diarrhoea'                                                                  | Did not have diarrhoea'                              | Self-reports                   |
| Acute respiratory infec-<br>tion (ARI) [3,4]                      | ARI was defined as symptoms of cough and shortness of breath during the two weeks preceding the survey. ARI was grouped as '1' = 'experienced ARI' or '2' = 'did not experience ARI'                                                                             | No                                                   | Self-reports                   |
| Anaemia [4,5]                                                     | Anaemia was defined as a haemoglobin count of less than 11 grams per decilitre (g/dl). Anaemia was grouped as '1' = 'Anaemic (<11g/dl)' or '2' = 'Not anaemic (>11g/dl)'. In 2016 EDHS, information on haemoglobin count was collected for children 6–59 months. | Not anaemic                                          | Haemoglobin meas-<br>urements  |
| <i>Proximal contextual factors</i>                                |                                                                                                                                                                                                                                                                  |                                                      |                                |
| Maternal nutritional sta-<br>tus [6,7]                            | Maternal nutrition was grouped as '1' = 'underweight (BMI <18.5 kg/m <sup>2</sup> )', '2' = 'normal weight (BMI ≥18.5 kg/m <sup>2</sup> and BMI ≤24.9 kg/m <sup>2</sup> )' or '3' = 'overweight or obese (BMI ≥25.0 kg/m <sup>2</sup> )'                         | Normal weight                                        | Anthropometric<br>measurements |
| Mothers' and fathers' ed-<br>ucational status [8–10]              | Mothers' and fathers' educational status were grouped as '1' = 'no schooling', '2' = 'primary education' or '3' = 'secondary education or higher'                                                                                                                | No schooling                                         | Self-reports                   |
| Mothers' and father's<br>employment [8–10]                        | Mothers' and fathers' employment were grouped as '1' = 'no employment', '2' = 'formal employment', or '3' = 'informal employment'                                                                                                                                | No employment                                        | Self-reports                   |
| Maternal age [8–10]                                               | Maternal age was grouped as '1' = '15–24 years', '2' = '25–34 years' or '3' = '35–49 years'.                                                                                                                                                                     | 15–24 years                                          | Self-reports                   |
| Household wealth index<br>[8–11]                                  | Household wealth index was grouped as '1' = 'poor', '2' = 'middle', or '3' = 'rich. For this study, 40% of the households was referred to as 'poor households', '20% of them as 'middle-class households', and the top 40% as rich households [2].               | Poor                                                 | Self-reports                   |
| Source of drinking water<br>and type of toilet facility<br>[8–10] | The source of drinking water and type of toilet facility were grouped as '1' = 'improved' or '2' = 'not improved'                                                                                                                                                | Not improved                                         | Self-reports                   |



|                                                             |                                                                                                                                                                                                                                                                                                                                           |                     |                                                        |
|-------------------------------------------------------------|-------------------------------------------------------------------------------------------------------------------------------------------------------------------------------------------------------------------------------------------------------------------------------------------------------------------------------------------|---------------------|--------------------------------------------------------|
| Type of cooking fuel [8–10]                                 | Type of cooking fuel was grouped as ‘1’ = ‘cleaned or ‘2’ = ‘not cleaned’                                                                                                                                                                                                                                                                 | Not cleaned         | Self-reports                                           |
| Frequency of ANC visits [8–10]                              | Frequency of ANC visits was grouped as ‘1’ = ‘none’, ‘2’ = ‘1–4 visits’ or ‘3’ = ‘four and above visits’                                                                                                                                                                                                                                  | None                | Self-reports                                           |
| Place of birth [8–10]                                       | Place of birth of was grouped as ‘home ‘or ‘health facility birth’                                                                                                                                                                                                                                                                        | Home                | Self-reports                                           |
| Perceived birth size [8–10]                                 | Perceived birth size was grouped as ‘1’ = ‘larger than average’, ‘2’ = ‘average’ or ‘3’ = ‘smaller than average’, and birth order (categorized as ‘1’, ‘2–4’ or ‘5 and above’).                                                                                                                                                           | Larger than average | Self-reports                                           |
| Child age [1]                                               | Child age was grouped as ‘1’ = ‘less than 6 months’, ‘2’ = ‘6–11 months’, ‘3’ = ‘12–17 months’, ‘4’ = ‘18–23 months’ or ‘5’ = ‘24–59 months’                                                                                                                                                                                              | Less than 6 months  | Self-reports                                           |
| <i>Environmental contextual factors</i>                     |                                                                                                                                                                                                                                                                                                                                           |                     |                                                        |
| Media exposure factors [8–10]                               | Media exposure factors included listening to radio, reading magazine, and watching television. Media exposure factors were grouped as ‘1’ = ‘Yes’ or ‘2’ = ‘No’                                                                                                                                                                           | No                  | Self-reports                                           |
| Mean annual daytime land surface temperature (DLST) [12,13] | DLST was defined daytime temperature of the land surface (skin temperature), detected by satellites by looking through the atmosphere to the ground [12]. The DLST was grouped as ‘1’ = ‘<30.0 °C’, ‘2’ = ‘30–34.9 °C’, or ‘3’ = ‘+35.0 °C’ [13].                                                                                         | < 30.0 °C           | Spatial resolutions (6 km by 6 km) obtained from MODIS |
| Mean annual rainfall [12,14]                                | Mean annual rainfall was grouped as ‘1’ = ‘low’ (less than 142 mm), ‘2’ = ‘medium’ (142–1200 mm) or ‘3’ = ‘high’ (more than 1200 mm) [58].                                                                                                                                                                                                | Low                 | Spatial resolutions (5km by 5km)                       |
| Aridity [12]                                                | Aridity was defined as the mean annual precipitation divided by mean annual potential evapotranspiration ranged from 0 (most arid) to 300 (most wet) [40]. The aridity index was grouped as ‘1’ = ‘arid’, aridity index of less than 17.5, ‘2’ = ‘semi-arid’, aridity index from 17.5 up to 32.5 or ‘3’ = ‘wet’, aridity index above 32.5 | Wet                 | Spatial resolution for covariates (55 km by 55 km)     |
| The number of wet days per annum [12]                       | The number of wet days was defined as the mean number of days receiving rainfall within the 2 km (urban) or 10 km (rural) buffer. The number of wet days was grouped as ‘1’ = ‘low’ (less than six), ‘2’ = ‘medium’ (from 6 up to 8 wet days), or ‘3’ = ‘high’ (more than 8 wet days)                                                     | Low                 | Spatial resolution for covariates (55 km by 55 km)     |

**Table S2.** Prevalence of stunting by proximal and contextual factors of stunting among children under-five years in Ethiopia, 2016 EDHS [*n* = 9,089].

| Variables                                | Prevalence of stunting |                     |                    |
|------------------------------------------|------------------------|---------------------|--------------------|
|                                          | 0–23 months of age     | 24–59 months of age | 0–59 months of age |
|                                          | * <i>n</i> (%)         | * <i>n</i> (%)      | * <i>n</i> (%)     |
| <i>Child feeding factors</i>             |                        |                     |                    |
| Early initiation of breastfeeding (EIBF) |                        |                     |                    |
| No                                       | 315 (28.8)             | -                   | -                  |
| Yes                                      | 767 (27.0)             | -                   | -                  |
| Minimum dietary diversity (MDD)          |                        |                     |                    |
| No                                       | 991 (28.0)             | -                   | -                  |
| Yes                                      | 90 (22.9)              | -                   | -                  |
| Minimum meal frequency (MMF)             |                        |                     |                    |
| No                                       | 665 (25.0)             | -                   | -                  |
| Yes                                      | 417 (32.6)             | -                   | -                  |
| Bottle feeding                           |                        |                     |                    |
| No                                       | 975 (28.8)             | -                   | -                  |
| Yes                                      | 107 (19.6)             | -                   | -                  |
| Duration of breastfeeding                |                        |                     | -                  |
| ≤12 months                               | 361 (16.8)             | -                   | 361 (16.8)         |
| >12 months                               | 720 (40.4)             | -                   | 3298 (44.6)        |
| General feeding status (in 24 hours)     |                        |                     |                    |
| Only breastmilk                          | 124 (17.3)             | 607 (59.4)          | 732 (42.0)         |
| Breastmilk + supplements                 | 804 (29.1)             | 27 (56.3)           | 832 (29.6)         |
| No breastmilk                            | 153 (33.7)             | 1943 (42.8)         | 2096 (42.0)        |
| <i>Child factors</i>                     |                        |                     |                    |
| Mother's perceived baby size at birth    |                        |                     |                    |
| Larger than average                      | 287 (24.6)             | 759 (41.4)          | 1046 (34.9)        |
| Average                                  | 424 (25.8)             | 1090 (44.7)         | 1513 (37.1)        |
| Smaller than average                     | 371 (33.0)             | 729 (54.3)          | 1100 (44.6)        |
| Diarrhoeal diseases                      |                        |                     |                    |
| No                                       | 859 (26.1)             | 2324 (45.6)         | 3182 (38.0)        |
| Yes                                      | 220 (34.4)             | 254 (49.8)          | 474 (41.3)         |
| Acute respiratory infection              |                        |                     |                    |
| No                                       | 977 (27.1)             | 2413 (45.7)         | 3390 (38.1)        |
| Yes                                      | 104 (32.2)             | 164 (50.3)          | 269 (41.3)         |
| Childhood anaemia                        |                        |                     |                    |
| No                                       | 234 (29.9)             | 1093 (39.5)         | 1327 (37.4)        |
| Yes                                      | 674 (33.1)             | 1460 (53.0)         | 2134 (44.6)        |
| <i>Maternal factors</i>                  |                        |                     |                    |
| Maternal nutritional status              |                        |                     |                    |
| Normal                                   | 761 (26.8)             | 1957 (46.9)         | 764 (41.1)         |
| Underweight                              | 284 (35.1)             | 480 (45.8)          | 2717 (38.8)        |
| Overweight                               | 21 (10.4)              | 96 (35.7)           | 117 (24.9)         |
| Obesity                                  | 8 (17.3)               | 16 (24.8)           | 24 (21.7)          |
| Maternal educational status              |                        |                     |                    |
| No schooling                             | 700 (29.6)             | 1899 (48.8)         | 2599 (41.5)        |

|                                  |             |             |             |
|----------------------------------|-------------|-------------|-------------|
| Primary education                | 331 (27.0)  | 597 (42.7)  | 928 (35.4)  |
| Secondary or higher education    | 51 (14.7)   | 82 (25.3)   | 132 (19.8)  |
| Maternal employment status       |             |             |             |
| No employment                    | 644 (27.3)  | 1404 (46.7) | 2047 (38.2) |
| Formal employment                | 98 (16.4)   | 400 (41.9)  | 498 (32.1)  |
| Informal employment              | 340 (34.7)  | 774 (47.0)  | 1113 (42.4) |
| <i>Health service factors</i>    |             |             |             |
| Antenatal care visits            |             |             |             |
| None                             | 378 (28.7)  | 597 (52.9)  | 975 (39.9)  |
| 1–3 visits                       | 361 (29.5)  | 444 (48.8)  | 805 (37.7)  |
| +4 visits                        | 288 (22.5)  | 376 (42.3)  | 664 (30.6)  |
| Place of birth                   |             |             |             |
| Home                             | 756 (30.5)  | 2116 (47.1) | 2871 (41.2) |
| Health facility                  | 326 (22.4)  | 462 (41.3)  | 787 (30.6)  |
| <i>Household factors</i>         |             |             |             |
| Household wealth status          |             |             |             |
| Poor                             | 572 (32.6)  | 1385 (51.7) | 1957 (44.1) |
| Middle                           | 209 (24.3)  | 553 (47.8)  | 762 (37.8)  |
| Rich                             | 300 (22.8)  | 639 (36.0)  | 939 (30.4)  |
| Source of drinking water         |             |             |             |
| Not protected                    | 715 (29.0)  | 1692 (47.5) | 2407 (40.0) |
| Protected                        | 367 (25.0)  | 885 (43.1)  | 1252 (35.5) |
| Toilet system                    |             |             |             |
| Not improved                     | 1009 (28.4) | 2395 (47.2) | 3404 (39.4) |
| Improved                         | 73 (19.0)   | 182 (34.2)  | 255 (27.9)  |
| <i>Climatic factors</i>          |             |             |             |
| Daytime land surface temperature |             |             |             |
| <30 °C                           | 459 (25.9)  | 1173 (44.1) | 1687 (38.0) |
| 30–34.99 °C                      | 461 (28.0)  | 1953 (46.1) | 1514 (38.6) |
| +35 °C                           | 183 (32.2)  | 1326 (45.3) | 570 (41.6)  |
| Annual average rainfall (in mm)  |             |             |             |
| <141 mm                          | 3 (37.2)    | 61 (53.5)   | 7 (41.1)    |
| 142–1199 mm                      | 791 (28.2)  | 3296 (45.3) | 2651 (39.0) |
| ≥1200 mm                         | 310 (26.3)  | 1095 (45.2) | 1114 (38.0) |
| Aridity                          |             |             |             |
| Wet                              | 152 (20.8)  | 467 (43.6)  | 629 (33.4)  |
| Semi-arid                        | 588 (29.5)  | 1808 (44.8) | 2034 (41.2) |
| Arid                             | 362 (28.7)  | 2177 (46.2) | 1108 (38.0) |
| Number of wet days per year      |             |             |             |
| Low                              | 189 (28.3)  | 1794b(45.0) | 583 (37.0)  |
| Medium                           | 370 (26.8)  | 1080 (41.5) | 1204 (36.9) |
| High                             | 544 (28.1)  | 1578 (48.9) | 1984 (40.5) |

\*n indicates weighted count.

**Table S3.** Second administrative level prevalence of stunting among under-five children in Ethiopia, EDHS 2016.

| Administrative zones     | 0–23 months age |      |      | 24–59 months age |      |      | 0–59 months of age |      |      |
|--------------------------|-----------------|------|------|------------------|------|------|--------------------|------|------|
|                          | %               | LCrI | UCrI | %                | LCrI | UCrI | %                  | LCrI | UCrI |
| 1. Afder                 | 30.0            | 12.9 | 55.4 | 48.7             | 24.8 | 73.5 | 36.1               | 12.6 | 53.2 |
| 2. Agnewak               | 28.8            | 12.3 | 53.2 | 33.9             | 15.8 | 58.5 | 28.5               | 11.2 | 48.2 |
| 3. Alle                  | 31.4            | 13.7 | 57.3 | 46.8             | 24.7 | 70.5 | 37.7               | 13.8 | 55.4 |
| 4. Amaro                 | 30.7            | 13.4 | 56.0 | 47.0             | 25.5 | 69.8 | 35.4               | 13.6 | 54.5 |
| 5. Arsi                  | 28.6            | 12.2 | 53.0 | 42.3             | 22.0 | 65.8 | 33.7               | 11.9 | 49.9 |
| 6. Asosa                 | 29.8            | 13.3 | 53.8 | 49.1             | 28.9 | 69.9 | 36.5               | 13.9 | 50.0 |
| 7. Awi                   | 27.6            | 11.7 | 51.8 | 43.8             | 23.3 | 67.0 | 30.4               | 11.9 | 49.3 |
| 8. Bale                  | 29.4            | 12.6 | 54.4 | 44.6             | 21.9 | 69.9 | 33.8               | 11.9 | 51.6 |
| 9. Basketo               | 29.6            | 12.8 | 54.6 | 48.5             | 25.6 | 72.5 | 36.0               | 12.5 | 52.2 |
| 10. Bench Maji           | 28.2            | 12.1 | 52.4 | 43.4             | 23.3 | 66.3 | 34.0               | 12.4 | 50.1 |
| 11. Borena               | 29.5            | 12.7 | 54.8 | 43.5             | 20.5 | 69.7 | 33.8               | 12.0 | 52.3 |
| 12. Buno Bedele          | 27.7            | 11.6 | 52.0 | 36.7             | 17.0 | 62.3 | 29.2               | 10.8 | 48.2 |
| 13. Burji                | 31.3            | 13.8 | 56.6 | 45.3             | 23.9 | 68.6 | 34.4               | 13.7 | 53.7 |
| 14. Central              | 29.4            | 13.0 | 53.4 | 54.0             | 32.8 | 74.1 | 37.7               | 14.3 | 51.0 |
| 15. Central Gondar       | 29.7            | 12.8 | 54.7 | 48.0             | 25.9 | 71.1 | 35.7               | 13.2 | 52.8 |
| 16. Daawa                | 29.1            | 12.4 | 54.1 | 42.0             | 19.6 | 68.2 | 31.9               | 11.5 | 51.1 |
| 17. Dawuro               | 30.2            | 13.2 | 55.1 | 46.8             | 25.7 | 69.4 | 34.4               | 13.4 | 52.6 |
| 18. Derashe              | 33.4            | 15.0 | 59.2 | 46.0             | 25.0 | 68.7 | 38.2               | 15.8 | 56.6 |
| 19. Dire Dawa rural      | 29.6            | 13.8 | 52.1 | 49.2             | 31.5 | 67.6 | 38.3               | 14.4 | 46.0 |
| 20. Dire Dawa urban      | 27.8            | 12.9 | 49.6 | 53.0             | 35.4 | 70.2 | 40.4               | 13.0 | 41.2 |
| 21. Doolo                | 28.5            | 12.0 | 53.2 | 44.1             | 21.4 | 69.8 | 31.7               | 11.7 | 51.2 |
| 22. East Gojam           | 29.6            | 12.9 | 54.2 | 52.6             | 30.8 | 73.8 | 38.4               | 14.7 | 54.5 |
| 23. East Hararge         | 28.7            | 12.3 | 53.2 | 43.2             | 22.2 | 67.1 | 33.3               | 11.7 | 49.6 |
| 24. East Shewa           | 27.6            | 11.7 | 51.7 | 38.2             | 19.2 | 61.9 | 29.8               | 10.9 | 47.7 |
| 25. East Wellega         | 28.4            | 12.0 | 52.8 | 37.7             | 18.1 | 62.6 | 31.1               | 11.5 | 49.4 |
| 26. Eastern              | 27.3            | 11.9 | 50.7 | 50.9             | 31.2 | 70.7 | 35.6               | 14.4 | 50.2 |
| 27. Erer                 | 29.0            | 12.3 | 54.0 | 43.1             | 20.0 | 69.8 | 33.6               | 11.9 | 52.3 |
| 28. Etang Special woreda | 30.0            | 13.2 | 54.5 | 29.4             | 13.8 | 52.0 | 26.2               | 11.6 | 47.2 |
| 29. Fafan                | 28.1            | 12.0 | 52.3 | 40.6             | 20.9 | 64.2 | 31.2               | 11.4 | 48.4 |
| 30. Finfine Special      | 26.6            | 11.6 | 49.7 | 40.2             | 21.9 | 61.9 | 33.1               | 11.8 | 46.9 |
| 31. Gamo                 | 30.0            | 13.2 | 54.7 | 47.6             | 26.8 | 69.5 | 36.3               | 14.5 | 53.2 |
| 32. Gedeo                | 33.1            | 15.6 | 57.1 | 52.9             | 33.4 | 72.1 | 42.1               | 18.7 | 56.1 |
| 33. Gofa                 | 30.2            | 13.1 | 55.3 | 47.7             | 25.5 | 71.2 | 36.3               | 13.0 | 52.7 |
| 34. Guji                 | 30.0            | 13.0 | 55.1 | 49.9             | 26.9 | 73.5 | 37.3               | 13.2 | 53.6 |
| 35. Guraghe              | 28.7            | 12.7 | 52.4 | 41.4             | 22.6 | 63.2 | 32.9               | 13.5 | 50.0 |
| 36. Hadiya               | 28.9            | 12.8 | 52.5 | 48.2             | 28.6 | 68.7 | 34.3               | 14.5 | 50.2 |
| 37. Halaba Special       | 32.0            | 14.6 | 56.6 | 46.5             | 26.9 | 67.6 | 37.2               | 13.9 | 50.7 |
| 38. Harari               | 25.8            | 12.1 | 46.3 | 50.2             | 33.8 | 66.9 | 36.2               | 13.6 | 41.0 |
| 39. Horo Gudru Wellega   | 28.2            | 11.9 | 52.6 | 40.8             | 20.1 | 65.6 | 31.2               | 11.4 | 50.1 |
| 40. Ilu Aba Bora         | 28.5            | 12.2 | 52.8 | 35.7             | 16.5 | 61.2 | 30.1               | 11.5 | 49.8 |
| 41. Jarar                | 28.4            | 12.0 | 53.1 | 42.8             | 20.7 | 68.4 | 32.8               | 11.6 | 50.6 |
| 42. Jimma                | 28.1            | 12.0 | 52.3 | 42.9             | 22.9 | 66.0 | 33.0               | 12.3 | 50.1 |
| 43. Kefa                 | 28.1            | 12.1 | 52.0 | 39.5             | 20.5 | 62.6 | 30.7               | 11.8 | 48.4 |
| 44. Kelem Wellega        | 28.2            | 12.0 | 52.6 | 40.0             | 20.0 | 64.5 | 31.9               | 11.7 | 50.3 |
| 45. Kemashi              | 27.7            | 11.8 | 51.8 | 42.8             | 22.6 | 66.2 | 32.6               | 12.4 | 50.1 |
| 46. Kembata Tibaro       | 30.7            | 13.8 | 54.8 | 47.6             | 28.2 | 68.1 | 33.5               | 13.9 | 49.2 |
| 47. Konso                | 31.0            | 13.5 | 56.8 | 44.8             | 22.8 | 69.2 | 35.1               | 13.2 | 54.1 |
| 48. Konta Special        | 29.8            | 13.0 | 54.5 | 44.1             | 23.4 | 67.4 | 34.3               | 13.3 | 52.7 |
| 49. Korahe               | 29.0            | 12.4 | 53.8 | 41.6             | 19.9 | 67.2 | 33.9               | 12.5 | 52.4 |
| 50. Liban                | 29.2            | 12.5 | 54.1 | 49.7             | 25.5 | 74.4 | 35.4               | 12.8 | 53.5 |

|     |                       |      |      |      |      |      |      |      |      |      |
|-----|-----------------------|------|------|------|------|------|------|------|------|------|
| 51. | Mao Komo Special      | 28.7 | 12.5 | 52.9 | 51.9 | 30.1 | 73.6 | 41.3 | 15.9 | 56.1 |
| 52. | Mejenger              | 25.1 | 10.4 | 48.1 | 37.8 | 19.9 | 60.3 | 28.4 | 11.8 | 46.3 |
| 53. | Mekele Special        | 29.4 | 13.4 | 52.4 | 56.6 | 37.4 | 74.6 | 42.7 | 15.7 | 49.4 |
| 54. | Metekel               | 28.9 | 12.5 | 53.4 | 43.5 | 22.6 | 67.2 | 31.7 | 12.6 | 51.1 |
| 55. | Mirab Omo             | 29.1 | 12.5 | 53.8 | 48.5 | 25.3 | 72.8 | 36.5 | 12.5 | 52.5 |
| 56. | Nogob                 | 29.2 | 12.4 | 54.2 | 42.5 | 19.8 | 69.0 | 33.3 | 11.9 | 52.2 |
| 57. | North Gondar          | 28.9 | 12.4 | 53.5 | 48.1 | 26.2 | 70.8 | 31.6 | 11.8 | 49.4 |
| 58. | North Shewa           | 28.5 | 12.2 | 52.9 | 46.3 | 24.9 | 69.4 | 32.7 | 12.6 | 51.2 |
| 59. | North Shewa           | 29.6 | 12.9 | 54.3 | 50.1 | 27.8 | 72.8 | 38.3 | 14.0 | 54.7 |
| 60. | North Wello           | 29.8 | 13.1 | 54.4 | 46.8 | 25.4 | 69.5 | 32.8 | 13.7 | 52.6 |
| 61. | North Western         | 27.2 | 11.5 | 51.0 | 49.2 | 28.1 | 71.0 | 32.3 | 12.1 | 48.2 |
| 62. | Nuwer                 | 33.2 | 15.0 | 58.7 | 39.9 | 20.0 | 63.8 | 38.9 | 15.6 | 55.1 |
| 63. | Oromia                | 29.9 | 13.1 | 54.7 | 55.3 | 32.7 | 76.1 | 40.7 | 16.5 | 58.4 |
| 64. | Region 14             | 23.8 | 10.8 | 44.0 | 39.0 | 23.5 | 57.3 | 33.0 | 12.7 | 40.1 |
| 65. | Shabelle              | 29.9 | 12.9 | 55.1 | 45.0 | 22.6 | 70.0 | 34.9 | 12.8 | 53.1 |
| 66. | Sheka                 | 25.8 | 10.8 | 49.1 | 38.2 | 20.2 | 60.7 | 29.1 | 11.9 | 47.4 |
| 67. | Sidama                | 30.1 | 13.5 | 54.0 | 44.4 | 25.9 | 64.9 | 33.5 | 14.1 | 49.4 |
| 68. | Siltie                | 29.9 | 13.3 | 54.1 | 44.8 | 25.6 | 66.0 | 36.0 | 14.6 | 51.8 |
| 69. | Siti                  | 29.0 | 12.4 | 53.8 | 45.8 | 23.0 | 70.5 | 33.9 | 12.0 | 51.7 |
| 70. | South Eastern         | 32.0 | 14.5 | 56.5 | 53.4 | 32.9 | 73.1 | 41.8 | 14.8 | 52.0 |
| 71. | South Gondar          | 29.8 | 13.0 | 54.5 | 50.5 | 28.4 | 72.7 | 37.0 | 13.5 | 52.6 |
| 72. | South Omo             | 29.5 | 12.6 | 54.7 | 46.2 | 22.8 | 71.7 | 34.7 | 12.2 | 52.6 |
| 73. | South Wello           | 30.3 | 13.4 | 55.1 | 47.3 | 25.5 | 70.2 | 33.4 | 13.2 | 51.8 |
| 74. | South West Shewa      | 29.3 | 12.9 | 53.4 | 41.2 | 21.9 | 64.3 | 34.8 | 13.8 | 52.9 |
| 75. | Southern              | 30.4 | 13.6 | 54.5 | 49.6 | 29.3 | 70.4 | 37.3 | 15.2 | 52.4 |
| 76. | Wag Hamra             | 32.2 | 14.2 | 58.2 | 48.9 | 26.2 | 72.1 | 37.3 | 13.6 | 53.6 |
| 77. | West Arsi             | 30.8 | 13.7 | 55.5 | 47.6 | 26.7 | 69.6 | 38.4 | 14.3 | 53.4 |
| 78. | West Gojam            | 27.4 | 11.6 | 51.4 | 48.2 | 27.3 | 70.0 | 33.0 | 12.3 | 49.4 |
| 79. | West Gondar           | 29.3 | 12.5 | 54.4 | 45.3 | 22.4 | 70.5 | 34.7 | 12.0 | 52.0 |
| 80. | West Guji             | 29.9 | 13.1 | 54.5 | 47.6 | 26.0 | 70.4 | 35.2 | 12.6 | 51.0 |
| 81. | West Hararge          | 28.7 | 12.2 | 53.5 | 37.3 | 17.6 | 62.3 | 30.7 | 10.6 | 47.8 |
| 82. | West Shewa            | 28.6 | 12.3 | 52.9 | 41.4 | 21.4 | 64.8 | 31.8 | 12.1 | 49.8 |
| 83. | West Wellega          | 28.0 | 11.9 | 52.2 | 44.3 | 23.6 | 67.8 | 33.6 | 12.2 | 50.3 |
| 84. | Western               | 27.6 | 11.5 | 52.1 | 43.6 | 22.0 | 68.1 | 30.5 | 11.1 | 48.8 |
| 85. | Wolayita              | 28.1 | 12.2 | 51.9 | 44.0 | 24.9 | 65.2 | 29.4 | 11.6 | 45.5 |
| 86. | Yem Special           | 26.6 | 11.4 | 49.9 | 51.9 | 31.7 | 72.0 | 38.1 | 16.0 | 53.6 |
| 87. | Zone 1 (Awsi Rasu)    | 30.5 | 13.6 | 55.0 | 50.0 | 27.8 | 72.4 | 37.4 | 14.1 | 53.6 |
| 88. | Zone 2 (Kilbet Rasu)  | 28.5 | 12.2 | 53.1 | 42.5 | 21.1 | 67.1 | 31.2 | 11.9 | 50.6 |
| 89. | Zone 3 (Gabi Rasu)    | 28.5 | 12.2 | 53.1 | 48.9 | 26.7 | 71.6 | 35.4 | 13.1 | 52.3 |
| 90. | Zone 4 (Fantana Rasu) | 29.8 | 13.1 | 54.5 | 48.8 | 27.5 | 70.9 | 34.0 | 14.3 | 53.5 |
| 91. | Zone 5 (Hari Rasu)    | 29.6 | 13.0 | 54.0 | 55.1 | 33.7 | 75.0 | 41.4 | 18.4 | 59.2 |

%; proportion of stunting; LCRI: lower credible interval; UCRI: upper credible interval.

# **File S1.** Model formulation, development and implementation.

## **Gaussian random fields (GRF)**

GRF is defined as a “collection of random variables where the observations occur in a continuous domain, and where every finite collection of random variables has a multivariate normal distribution”.

Geostatistical data are assumed to be a partial realization of a random process. Suppose  $\mathbf{Z}_i, \dots, \mathbf{Z}_n$  are observations of a spatial variable  $\mathbf{Z}$  at locations  $i, \dots, n$ .

$$\{\mathbf{Z}(\mathbf{t}): \mathbf{t} \in \mathbf{D} \subset \mathbf{R}^2\}, \dots, \text{GRF}$$

$\mathbf{D}$  is a fixed subset of  $\mathbf{R}^2$  and the spatial index  $\mathbf{Z}_i$  varies continuously throughout  $\mathbf{D}$ .  $\mathbf{Z}_i$  can be observed at a finite set of locations for practical reasons. These properties are helpful for predicting outcomes at unobserved locations, and for the construction of a spatially continuous surface of the outcome of study.

A less restrictive form of the second-order stationarity (or weakly stationarity) employed as a random process. Under this form, the process has constant mean at each location, and the covariance depends only on the distances between locations

$$\begin{aligned} E[\mathbf{Z}(\mathbf{s})] &= \boldsymbol{\mu}, \forall \mathbf{s} \in \mathbf{D}, \\ \text{Cov}(\mathbf{Z}(\mathbf{s}), \mathbf{Z}(\mathbf{s} + \mathbf{h})) &= \mathbf{C}(\mathbf{h}), \forall \mathbf{s} \in \mathbf{D}, \forall \mathbf{h} \in \mathbf{R}^2 \end{aligned}$$

At this stage, information related to the continuity and spatial variability can be conveyed using a plot of empirical semi-variogram against the separation distance.

For this study, the Matérn covariance function covariance matrix of GRF, which is used to specify the spatial dependence structure.

The Matérn covariance function is defined as

$$\text{Cov}(\mathbf{Z}(\mathbf{s}_i), \mathbf{Z}(\mathbf{s}_j)) = \frac{\sigma^2}{2^{\nu-1} \Gamma(\nu)} (\kappa ||\mathbf{s}_i - \mathbf{s}_j||)^{\nu} K_{\nu}(\kappa ||\mathbf{s}_i - \mathbf{s}_j||)$$

$||\mathbf{s}_i - \mathbf{s}_j||$  denotes the distance between locations  $\mathbf{s}_i$  and  $\mathbf{s}_j$ ,  $\sigma^2$  is the variance of the spatial field, and  $K_{\nu}(\cdot)$  is the modified Bessel function of second kind and order  $\nu > 0$ . The integer value of  $\nu$  determines the mean square variability of the process.  $\kappa > 0$  is related to the range  $\rho$ , the distance at which the correlation between two points is approximately zero (correlation decaying point).

## **Stochastic partial differential equation approach**

In geostatistical data, assuming spatially continuous variable underlying the observations that can be modelled using a GRF, and the stochastic partial differential equation approach (SPDE) can be implemented in the R-INLA package to fit a spatial model and predict the variable of interest at un-sampled locations.

Unlike the area data, point data do not have explicit neighbours and thus we would have to calculate the autocorrelation structure between each possible point existing in space. We discretise the study region to create a mesh that would create artificial (but useful) set of neighbours so we could calculate the autocorrelation between points.

The SPDE approximates this by using the Finite Element method to represent the spatial process. In these spatial representations, the spatial domain  $\mathbf{D}$  (the study region) is divided into a partition of non-intersecting triangles, leading to a triangulated mesh with  $n$  nodes and  $n$  basis functions.

$$x(s) = \sum_{k=1}^n \psi_k(s) x_k$$

Basis functions  $\psi_k(\cdot)$  are defined as piecewise linear functions on each triangle that is equal to 1 at vertex  $k$ , and equal to 0 at the other vertices.

### Model formulation and development

Conditional on the true prevalence of stunting  $P(\mathbf{z}_i)$  at cluster  $\mathbf{z}_i$ , we assume a binomial distribution for  $Y_i$ . Let  $Y_i$  be the number of stunted children out of  $N_i$  sampled at cluster  $i$ :

$$\begin{aligned} Y_i | P(\mathbf{z}_i) &\sim \text{Binomial}(N_i, P(\mathbf{z}_i)) \\ \text{logit}(P(\mathbf{z}_i)) &= \mathbf{B}\mathbf{0} + \mathbf{B}\mathbf{x}_i + \boldsymbol{\omega}_i + \boldsymbol{\varepsilon}_i \\ \boldsymbol{\omega}_i &\sim \text{GP}(\mathbf{0}, \boldsymbol{\Sigma}) \end{aligned}$$

Here,

- $\mathbf{B}\mathbf{0}$  denotes the intercept;
- $\mathbf{B}$  is the coefficient for explanatory variables;
- $\boldsymbol{\omega}_i$  is a correlated spatial error term, accounting for spatial autocorrelation between data points; and
- $\boldsymbol{\varepsilon}_i \sim N(\mathbf{0}, \sigma_{\text{nugget}}^2)$  is an independent error term known as nugget effect.

## Model Implementation using R-INLA

### 1. Loading datasets

```
# loading merged individual level and geo-covariates at cluster level
geo.df.cov <- read_rds("E:/Bayesian/Stunting/Working datasets/geo_df_cov_U2.rds")

# loading administrative shape files
adm0 <- readOGR("E:/Bayesian/Working datasets/eth_admbnda_csa_bofed_20191028_shp/eth_admbnda_adm0_csa_bofed_20190827.shp")
adm1 <- readOGR("E:/Bayesian/Working datasets/eth_admbnda_csa_bofed_20191028_shp/eth_admbnda_adm1_csa_bofed_20190827.shp")
adm2 <- readOGR("E:/Bayesian/Working datasets/eth_admbnda_csa_bofed_20191028_shp/eth_admbnda_adm2_csa_bofed_20190827.shp")

#converting the main dataset to dataframe
geo.df.cov.df <- data.frame(geo.df.cov)

#Retained the outcome variable and covariates after variable selection
finalcov <- dplyr::select(geo.df.cov.df, c(DHSCLUST, LONGNUM, LATNUM, stunting, MDD, MMF, MAD, eibf, bofeed,
                                          momwork, childfeed_rec, birthsize_rec, resplace, childage, DurBF, momedu, wealth, BMIC_rec,SWater,
                                          toiletsystem, ancvisit, placebirth, anemia, ari, Diarrhea, aridity, ann_rainfall, DLST, wetdays))

#Preparing data for cross validation
aggr <- aggregate(cbind(stunting, pop)~ DHSCLUST, data=finalcov, sum)
aggr$prev <- aggr$stunting/aggr$pop
set.seed(206)
id.cross <- sample(c(1:nrow(aggr)),ceiling(nrow(aggr)*0.75))
aggr$prev[-id.cross] <- NA
link <- rep(NA,nrow(aggr))
link[which(is.na(aggr$prev))] <- 1
observed.values <- aggr$prev[is.na(link)==F]
```

### 2. Creating SPDE model

#### 2.1. Mesh construction

#creating spatial point data frame and assigning coordinate reference system

```
xy <- finalcov[,c(2,3)]
```



```
my.sf.point <- st_as_sf(x = geo.df.cov, coords = xy, crs = "+proj=longlat +datum=WGS84 +ellps=WGS84 +towgs84=0,0,0")
sps <- as(my.sf.point, "Spatial")
spst <- spTransform(sps, CRS("+proj=longlat +datum=WGS84"))#setting the correct coordinate system
```

#### **#adding the variables longitude and latitude to the data frames**

```
geo.df.cov[, c("LONGNUM", "LATNUM")] <- coordinates(spst)
points.sf <- st_as_sf(spst) #cluster points as sf file (will be used for mapping in later steps)
bdry.sf <- st_as_sf(adm1) #sf file created from the regional boundaries (will be used for mapping in later steps)
```

#### **#artificial mesh for spatial autocorrelation#####**

```
coo <- cbind(geo.df.cov$LONGNUM, geo.df.cov$LATNUM)
bdry <- inla.sp2segment(adm0)
bdry$loc <- inla.mesh.map(bdry$loc)

mesh <- inla.mesh.2d(loc = coo, boundary = bdry, max.edge=c(0.05, 1),
                    max.n=c(48000, 16000), ## Safeguard against large meshes.
                    max.n.strict=c(128000, 128000), ## Don't build a huge mesh!
                    cutoff=0.01, ## Filter away adjacent points.
                    offset=c(0.4, 1)) ## Offset for extra boundaries, if needed.

mesh$n
plot(mesh)
points(coo, col = "red")
```

## **2.2. SPDE and projection matrix A**

```
spde <- inla.spde2.matern(mesh = mesh, alpha = 2, groupsconstr = TRUE) #Building SPDE
A.est <- inla.spde.make.A(mesh, loc = coo) #projection matrix
```

## **2.3. INLA stack**

###.....the INLA stack for estimation.....##

```
stk.est.stunt.u2.new <- inla.stack(data=list(y=finalcov$stunting), #the response
                                A=list(A.est, 1, 1), #the A matrix; the 1 is included to make the list(covariates)
                                effects = list(c(i=1:spde$n.spde, list(Intercept = 1)), # specify the manual intercept!
```

```
list(finalcov[,5:29]),
cluster = finalcov$DHSClust),

#this is a quick name so you can call upon easily
tag='est.stunt.u2')
```

## 2.4. Model fitting

### #the non-spatial random intercept model

```
f.stunt.nonsp.u2 <- y ~ relevel(childfeed_rec, 2) + MDD + MMF + MAD + eibf + bofeed + DurBF + momedu + birthsize_rec + wealth + relevel (BMIC_rec, 2) + momwork + SWater + toiletsystem + ancvisit + placebirth + anemia + ari + Diarrhea + relevel(aridity,3) + ann_rainfall + DLST + wetdays + f(cluster, model = "iid")
```

```
model_stunt_nonsp_u2<- inla(f.stunt.nonsp.u2, data=inla.stack.data(stk.est.stunt.u2),family= 'binomial',
control.predictor=list(A=inla.stack.A(stk.est.stunt.u2), link = 1, compute=TRUE),
control.compute = list(dic = TRUE, waic = TRUE, config = TRUE),
verbose = FALSE)
```

### ##refit for best model (including geo-spatial model for predition)

```
f.stunt.u2 <- y ~ relevel(childfeed_rec, 2) + MDD + MMF + MAD + eibf + bofeed + DurBF + momedu + birthsize_rec + wealth + relevel (BMIC_rec, 2) + momwork + SWater + toiletsystem + ancvisit + placebirth + anemia + ari + Diarrhea + relevel(aridity,3) + ann_rainfall + DLST + wetdays + f(cluster, model = "iid", group = cluster, control.group = list(model = "iid")) + f(i, model=spde)
```

```
model.stunt.u2 <- inla(f.stunt.u2, data=inla.stack.data(stk.est.stunt.u2,spde=spde),family= 'binomial',
control.predictor=list(A=inla.stack.A(stk.est.stunt.u2), link = 1, compute=TRUE),
control.compute = list(dic = TRUE, waic = TRUE, config = TRUE),
verbose = FALSE)
```

## 2.5. Model validation

```
fitted.values.logit <- model.stunt.u2$summary.fitted.values[is.na(link)==F,1]
fiited.values <- exp(fitted.values.logit)/(1 + exp(fitted.values.logit))
```

```
rmse <- sqrt(mean((observed.values-fitted.values)^2))
```

```
fit0025 <- model.stunt.u2$summary.fitted.values[is.na(link)==F,"0.025quant"]
fit0975 <- model.stunt.u2$summary.fitted.values[is.na(link)==F,"0.975quant"]
coverage <- mean((observed.values>=fit0025)&(observ.val<=fit0975))
```

### 3. Model prediction at fine spatial grid

```
##.....5km by 5km grid for prediction.....#
#Projection of the random field
points.em <- mesh$loc
stepsize <- 5 * 1 / 111          # This is the coordinates units
x.range <- diff(range(points.em[,1])) # calculate the length of the x range
y.range <- diff(range(points.em[,2])) # calculate the length of the y range
nxy <- round(c(x.range, y.range)/stepsize) # Calculate the number of cells in the x and y ranges

##..... Project the spatial field on the mesh vertices.....##
projgrid <- inla.mesh.projector(mesh,
                                xlim = range(points.em[,1]),
                                ylim = range(points.em[,2]),
                                dims = nxy)

#.....removing points outside the boundary.....##
xy.in <- inout(projgrid$lattice$loc, bdry$loc)

##.....prediction location coordinates.....##
prdcoo <- projgrid$lattice$loc[which(xy.in), ]

#extracted covariates at prediction locations
predcov <- read_rds("E:/Bayesian/Stunting/Working datasets/pred_stunt_cov_U2.rds")

#.....prediction stack for response variable.....#
stk.pred.stunt.response.u2 <- inla.stack(data = list(y = NA),
                                         A = list(projgrid$proj$A, 1, 1),
                                         effects = list(i=1:spde$n.spde, list(Intercept = rep(1, 377 * 298)),
```

```
list(predcov [,5:14]))  
tag = 'pred.stunt.response.u2')
```

### **#We join all together the three linear predictors**

```
join.stack.stunt.response.u2 <- inla.stack(stk.est.stunt.u2, stk.pred.stunt.response.u2)
```

### **#fitting the prediction model**

```
f.pred.stunt.u2 <- y ~ 1 + momedu_pred + SWater_pred + toiletsystem_pred + ancvisit4_pred + placebirth_pred + aridity_pred + ann_rainfall_pred + DLST_pred + wetdays_pred  
+ f(i, model=spde)
```

```
model.pred.stunt.response.u2 <- inla(f.pred.stunt.u2, data = inla.stack.data(join.stack.stunt.response.u2), family = "binomial",  
control.predictor = list(A = inla.stack.A(join.stack.stunt.response.u2), compute = TRUE),  
control.results=list(return.marginals.random=FALSE, return.marginals.predictor=FALSE))
```

### **# prevalence at prediction locations**

```
p.prev.stunt.resp.logit <- model.pred.stunt.response.u2$summary.fitted.values[index.pred.stunt.response.u2,"mean"]  
p.prev.stunt.response <- exp(p.prev.stunt.resp.logit)/(1 + exp(p.prev.stunt.resp.logit))  
summary(p.prev.stunt.response)  
p.prev.stunt.resp <- data.frame(x = prdcoo[, 1], y = prdcoo[, 2],  
value = p.prev.stunt.response[xy.in], variable = "Predicted prevalence of stunting")  
p.prev.stunt.resp.sp = SpatialPixelsDataFrame(points = p.prev.stunt.resp[c("x", "y")], data = p.prev.stunt.resp,  
proj4string = CRS("+proj=longlat +datum=WGS84"))  
p.prev.stunt.resp.r <- as(p.prev.stunt.resp.sp, "RasterStack")  
p.prev.stunt.resp.ra <- disaggregate(p.prev.stunt.resp.r$value, 5)  
p.prev.stunt.resp.raster <- focal(p.prev.stunt.resp.ra, w=matrix(1,5,5), mean)
```

### **#modelled surface map for prevalence**

```
coords_stunt_u2 <- xyFromCell(p.prev.stunt.resp.raster, seq_len(ncell(p.prev.stunt.resp.raster)))  
p_prev_stunt_u2_df <- stack(as.data.frame(getValues(p.prev.stunt.resp.raster)))  
names(p_prev_stunt_u2_df) <- c('value', 'variable')  
prev_stunt_u2_cbind <- cbind(coords_stunt_u2, p_prev_stunt_u2_df)  
regions_sf <- cbind(bdry.sf.adm1, st_coordinates(st_centroid(bdry.sf.adm1)))
```

### #visualizing surface map of stunting

```
map.stunt_u2 <- ggplot(regions_sf) +  
  geom_tile(data = prev_stunt_u2_cbind, aes(x=x, y=y, fill = value), na.rm = T) +  
  geom_sf(fill = NA, inherit.aes = F) +  
  geom_sf_text(aes(label = ADM1_EN), size = 5, fontface = "bold", colour = "black") +  
  scale_fill_gradientn(name = "Prevalence of \n Stunting", labels = scales::comma, colors = col, na.value="white") +  
  theme_bw() + theme(axis.text = element_blank(), axis.ticks = element_blank(),  
    axis.line = element_blank(), axis.title.x=element_blank(),  
    axis.title.y=element_blank(), panel.grid.major = element_blank(),  
    panel.grid.minor = element_blank(), panel.border = element_blank(),  
    panel.background = element_blank(), legend.position = c(0.90, 0.7),  
    text = element_text(size = 13, face = "bold")) +  
  annotation_scale(location = "bl", width_hint = 0.25, text_cex = 1, text_face = "bold") +  
  annotation_north_arrow(location = "tl", which_north = "true",  
    pad_x = unit(0.5, "cm"), pad_y = unit(0.5, "cm"),  
    style = north_arrow_fancy_orienteering)
```

## References

1. WHO and UNICEF, *Indicators for assessing infant and young child feeding practices Part 1 Definitions*. 2008.
2. Akombi, B.J., et al., *Stunting and severe stunting among children under-5 years in Nigeria: A multilevel analysis*. BMC Pediatrics, 2017. **17**(1): p. 15.
3. WHO. *Diarrhoeal disease*. 2017. Available online: <https://www.who.int/news-room/fact-sheets/detail/diarrhoeal-disease> (accessed on 25 November 2020).
4. Croft, et al., *Guide to DHS Statistics: DHS-7*. 2018: Rockville, Maryland, USA.
5. Central Statistics Agency (CSA) [Ethiopia] and ICF International, *Ethiopia demographic and health survey 2016*. 2016, Central Statistical Agency (CSA) and ICF International: Addis Ababa, Ethiopia and Rockville, Maryland, USA.
6. Ahmed, K.Y., et al., *Trends and determinants of underweight and overweight/obesity among urban Ethiopian women from 2000 to 2016*. BMC Public Health, 2020. **20**(1): p. 1276.
7. Ahmed, K.Y., et al., *Factors associated with underweight, overweight, and obesity in reproductive age Tanzanian women*. PLOS ONE, 2020. **15**(8): p. e0237720.
8. Ahmed, K.Y., et al., *Trends and factors associated with complementary feeding practices in Ethiopia from 2005 to 2016*. **n/a(n/a)**: p. e12926.
9. Ahmed, K.Y., et al., *Trends and determinants of early initiation of breastfeeding and exclusive breastfeeding in Ethiopia from 2000 to 2016*. International Breastfeeding Journal, 2019. **14**(1): p. 40.
10. Ahmed, K.Y., et al., *Associations between infant and young child feeding practices and acute respiratory infection and diarrhoea in Ethiopia: A propensity score matching approach*. PLOS ONE, 2020. **15**(4): p. e0230978.
11. Ogbo, F.A., P. Ogeleka, and A.O. Awosemo, *Trends and determinants of complementary feeding practices in Tanzania, 2004-2016*. Trop Med Health, 2018. **46**: p. 40.
12. Benjamin Mayala, et al., *The DHS program geospatial covariate datasets manual (second edition)*. 2018, ICF: Rockville, Maryland, USA.
13. Tusting, L.S., et al., *Environmental temperature and growth faltering in African children: a cross-sectional study*. The Lancet Planetary Health, 2020. **4**(3): p. e116-e123.
14. Kidanewold, B., Y. Seleshi, and A. Melesse, *Surface Water and Groundwater Resources of Ethiopia: Potentials and Challenges of Water Resources Development*. 2014. p. 97-118.
